# Supplementary material
Source: publisher site journal article supplement (https://www.spandidos-publications.com/8547/downloadSupplementary)
Supplement: Supplementary file 1 [file downloadSupplementary]

Table SI. Shared lactylation mechanisms in digestive cancer.

| A, Histone lactylation                                  |                                                                            |              |                                                        |         |
|---------------------------------------------------------|----------------------------------------------------------------------------|--------------|--------------------------------------------------------|---------|
| Lactylation event                                       | Regulatory axis                                                            | Cancer types | Core function                                          | (Refs.) |
| H3K18la-glycolytic positive feedback loop               | HCC, H3K18la-YBX1; PC, H3K18la-TTK/BUB1B-P300; PC, H3K18la-TTK(Y239p)-LDHA | HCC and PC   | Promotes glycolytic positive feedback loop             | (44,45) |
| H3K9la-mediated immunosuppression                       | EC, H3K9la-LAMC2-VEGFA; CRC, H3K9la-PKM2                                   | EC and CRC   | Promotes immunosuppressive microenvironment formation  | (47,48) |
| B, Non-histone lactylation                              |                                                                            |              |                                                        |         |
| Lactylation event                                       | Regulatory axis                                                            | Cancer types | Core function                                          | (Refs.) |
| $\beta$ -catenin/Wnt pathway activation via lactylation | EC, Axin1 K147la; CRC, direct $\beta$ -catenin lactylation                 | EC and CRC   | Activates Wnt pathway, promotes stemness/proliferation | (55,56) |

Axin1, axis inhibition protein 1; BUB1B, BUB1 mitotic checkpoint serine/threonine kinase B; CRC, colorectal cancer; EC, esophageal cancer; HCC, hepatocellular carcinoma; LAMC2, laminin subunit  $\gamma$  2; LDHA, lactate dehydrogenase A; PC, pancreatic cancer; PKM2, pyruvate kinase M2; TTK, TTK protein kinase; VEGFA, vascular endothelial growth factor A; YBX1, Y-box binding protein 1.

Table SII. Cancer-specific lactylation mechanisms in digestive cancer.

| A, EC                                                                |                                                                                    |         |
|----------------------------------------------------------------------|------------------------------------------------------------------------------------|---------|
| Lactylation event/regulatory axis                                    | Core function                                                                      | (Refs.) |
| SHMT2 lactylation                                                    | Promotes glycolysis, stemness and migration                                        | (71)    |
| B, GC                                                                |                                                                                    |         |
| Lactylation event/regulatory axis                                    | Core function                                                                      | (Refs.) |
| H3K18la-METTTL3-PD-L1 axis                                           | T-cell immunosuppression                                                           | (49)    |
| H3K18la-VCAM-1-AKT/mTOR axis                                         | Promotes EMT and M2 recruitment                                                    | (50)    |
| AARS1-YAP-TEAD lactylation circuit                                   | Promotes proliferation                                                             | (30)    |
| High copper-AARS1/2-METTTL16 K229la-cuproptosis axis                 | Promotes cuproptosis                                                               | (81,82) |
| Lactate-PCBP2-H3K14la-LDHA positive feedback loop                    | Promotes glycolytic positive feedback and ferroptosis resistance                   | (83)    |
| C, CRC                                                               |                                                                                    |         |
| Lactylation event/regulatory axis                                    | Core function                                                                      | (Refs.) |
| CAF-lactate-H3K18la-ANTXR1 dual activation axis                      | Promotes stemness and chemoresistance                                              | (95)    |
| RAR $\gamma$ -TRAF6/NF- $\kappa$ B/IL-6/STAT3 signaling axis         | Promotes macrophage protumor polarization and chemotherapy resistance              | (96)    |
| SIRT3-ME2 lactylation-redox homeostasis axis                         | Regulates redox homeostasis to promote tumor growth                                | (18)    |
| MRE11 K673 lactylation-DNA repair axis                               | Promotes HR repair leading to chemoresistance                                      | (90)    |
| DNA damage-ATM-GCN5-XLF K288la-NHEJ repair axis                      | Promotes NHEJ repair leading to chemoresistance                                    | (91)    |
| HDAC1 K412 lactylation-ferroptosis resistance axis                   | Induces ferroptosis resistance                                                     | (94)    |
| eEF2 K439/K594 lactylation-translation efficiency axis               | Enhances translation efficiency                                                    | (58)    |
| NOP2 lactylation-m <sup>5</sup> C-glycolysis positive feedback       | Promotes glycolytic positive feedback                                              | (92)    |
| NOL6 lactylation-NOL6-Y1-c-Myc transcriptional positive feedback     | Promotes c-Myc transcriptional positive feedback                                   | (93)    |
| D, HCC                                                               |                                                                                    |         |
| Lactylation event/regulatory axis                                    | Core function                                                                      | (Refs.) |
| H3K18la-HECTD2-KEAP1-NRF2 antioxidant axis                           | Promotes antioxidant response leading to lenvatinib resistance                     | (53)    |
| AARS1-AKR1B10 K173la-LDHA Y10p-glycolysis positive feedback          | Enhances glycolytic positive feedback leading to lenvatinib resistance             | (57)    |
| Lactylation-IGF2BP3-PCK2/NRF2-m <sup>6</sup> A-lenvatinib resistance | Stabilizes PCK2/NRF2 mRNA promoting lenvatinib resistance                          | (59)    |
| PARK7-IGF2BP3 K76la-FSP1-ferroptosis resistance-HAIC resistance      | Induces ferroptosis resistance leading to HAIC resistance                          | (60)    |
| Lactate-H3K18la-NUPR1-immunotherapy resistance                       | Promotes M2 polarization and T-cell exhaustion leading to immunotherapy resistance | (101)   |

|                                                                                           |                                                                                   |         |
|-------------------------------------------------------------------------------------------|-----------------------------------------------------------------------------------|---------|
| Lactate-TWIST1 K33la-EMT                                                                  | Promotes EMT                                                                      | (104)   |
| Xklp2l-PP1-AURKA-cell cycle                                                               | Promotes cell cycle progression                                                   | (99)    |
| LDHA-lactate-YAP K102la-malignant progression                                             | Activates YAP promoting malignant progression                                     | (103)   |
| H3K14la-NEDD4-PTEN-PI3K/Akt/mTOR-glycolysis positive feedback                             | Activates PI3K/Akt/mTOR promoting glycolysis                                      | (106)   |
| ABCF1 lactylation-nuclear translocation-KDM3A-HIF1 $\alpha$ -glycolysis positive feedback | Activates HIF1 $\alpha$ promoting glycolytic positive feedback                    | (105)   |
| ZNF207-PRDX1 K67la-NRF2-ferroptosis resistance-regorafenib resistance                     | Activates NRF2 promoting ferroptosis resistance leading to regorafenib resistance | (107)   |
| H3K56la-OCT4-Stemness                                                                     | Promotes stemness                                                                 | (102)   |
| H2B K58la-NDRG1-GSK-3 $\beta$ -p53-senescence escape-survival                             | Inhibits p53 promoting senescence escape                                          | (100)   |
| Lactate-MOESIN lactylation-TGF- $\beta$ /SMAD3-Treg differentiation-immune evasion        | Promotes Treg differentiation leading to immune evasion                           | (24)    |
| H3K18la/H3K9la-USP34-DNA repair-chemoresistance                                           | Promotes DNA repair leading to chemoresistance                                    | (52)    |
| E, PC                                                                                     |                                                                                   |         |
| Lactylation event/regulatory axis                                                         | Core function                                                                     | (Refs.) |
| Matrix stiffness-LDHA-lactate-FOXO3-sustained autophagy                                   | Induces sustained autophagy                                                       | (61)    |
| Lactate-EP300-NMNAT1 K128la-NAD <sup>+</sup> salvage-Sirt1-apoptosis inhibition           | Inhibits apoptosis                                                                | (13)    |
| Macrophage-ENSA K63la-PP2A-STAT3-CCL2-TAM recruitment-immunotherapy resistance            | Promotes TAM recruitment leading to immunotherapy resistance                      | (112)   |
| TFEB K91la-WWP2-ubiquitination (decreases) -autophagy/lysosomal activity (increases)      | Promotes autophagy                                                                | (114)   |
| RHOF-c-Myc-PKM2-glycolysis-lactate-Snail1 lactylation-EMT                                 | Induces EMT                                                                       | (111)   |
| H3K18la-m <sup>6</sup> A-TRAF6/ALDH1A3-autophagy-drug resistance                          | Stabilizes TRAF6/ALDH1A3 mRNA promoting autophagy-mediated drug resistance        | (51)    |
| CTCF-IGF2BP2-CSF1-M2 polarization                                                         | Promotes M2 polarization                                                          | (113)   |
| NUSAP1 lactylation-c-Myc/HIF1 $\alpha$ -LDHA positive feedback                            | Enhances glycolytic positive feedback                                             | (110)   |

AARS1, alanyl-tRNA synthetase 1; AARS2, alanyl-tRNA synthetase 2; ABCF1, ATP binding cassette subfamily F member 1; AKR1B10, aldo-keto reductase family 1 member B10; AKT, protein kinase B; ALDH1A3, aldehyde dehydrogenase 1 family member A3; ANTXR1, anthrax toxin receptor 1; ATM, ataxia telangiectasia mutated; AURKA, aurora kinase A; CAF, cancer-associated fibroblast; CCL2, C-C motif chemokine ligand 2; CRC, colorectal cancer; CSF1, colony stimulating factor 1; CTCF, CCCTC-binding factor; EC, esophageal cancer; eEF2, eukaryotic elongation factor 2; EMT, epithelial-mesenchymal transition; ENSA, endosulfine  $\alpha$ ; EP300, E1A binding protein P300; FOXO3, forkhead box O3; FSP1, ferroptosis suppressor protein 1; GC, gastric cancer; GCN5, general control of amino acid synthesis 5; GSK-3 $\beta$ , glycogen synthase kinase 3  $\beta$ ; HAIC, hepatic arterial infusion chemotherapy; HCC, hepatocellular carcinoma; HDAC1, histone deacetylase 1; HECTD2, HECT domain E3 ubiquitin protein ligase 2; HIF1 $\alpha$ , hypoxia-inducible factor 1  $\alpha$ ; HR, homologous recombination; IGF2BP2, insulin-like growth factor 2 mRNA binding protein 2; IGF2BP3, insulin-like growth factor 2 mRNA binding protein 3; IL-6, interleukin 6; KDM3A, lysine demethylase 3A; KEAP1, kelch-like ECH-associated protein 1; LAMC2, laminin subunit  $\gamma$  2; LDHA, lactate dehydrogenase A; ME2, malic enzyme 2; METTL3, methyltransferase-like 3; METTL16, methyltransferase-like 16; MOESIN, moesin; MRE11, meiotic recombination 11 homolog; mRNA, messenger ribonucleic acid; m<sup>5</sup>C, 5-methylcytosine; m<sup>6</sup>A, N6-methyladenosine; mTOR, mechanistic target of rapamycin; NAD<sup>+</sup>, nicotinamide adenine

dinucleotide; NDRG1, N-Myc downstream-regulated gene 1; NEDD4, neural precursor cell expressed developmentally down-regulated 4; NF- $\kappa$ B, nuclear factor kappa-light-chain-enhancer of activated B cells; NHEJ, non-homologous end joining; NMNAT1, nicotinamide mononucleotide adenylyltransferase 1; NOL6, nucleolar protein 6; NOP2, NOP2 nucleolar protein; NRF2, nuclear factor erythroid 2-related factor 2; NUPR1, nuclear protein 1; NUSAP1, nucleolar and spindle-associated protein 1; OCT4, octamer-binding transcription factor 4; P300, E1A binding protein P300; PARK7, parkinsonism associated deglycase; PC, pancreatic cancer; PCBP2, poly(rC)-binding protein 2; PCK2, phosphoenolpyruvate carboxykinase 2; PD-L1, programmed death-ligand 1; PI3K, phosphoinositide 3-kinase; PKM2, pyruvate kinase M2; PP1, protein phosphatase 1; PP2A, protein phosphatase 2A; PRDX1, peroxiredoxin 1; PTEN, phosphatase and tensin homolog; RAR $\gamma$ , retinoic acid receptor  $\gamma$ ; RHOF, Ras homolog family member F; RNA, ribonucleic acid; SIRT1, sirtuin 1; SIRT3, sirtuin 3; SMAD3, SMAD family member 3; Snail1, snail family transcriptional repressor 1; STAT3, signal transducer and activator of transcription 3; TAM, tumor-associated macrophage; TEAD1, TEA domain transcription factor 1; TFEB, transcription factor EB; TGF- $\beta$ , transforming growth factor  $\beta$ ; TRAF6, TNF receptor-associated factor 6; Treg, regulatory T cell; TTK, TTK protein kinase; TWIST1, twist family BHLH transcription factor 1; Ub, ubiquitin; USP34, ubiquitin-specific protease 34; VCAM-1, vascular cell adhesion molecule-1; VEGFA, vascular endothelial growth factor A; WWP2, WW domain containing E3 ubiquitin protein ligase 2; XLF, XRCC4-like factor; Xklp2, Xenopus kinesin-like protein 2; YAP, Yes-associated protein; ZNF207, zinc finger protein 207.
